# Supplementary material
Source: PubMed Central journal article supplement (PMC6339570)
Supplement: NIHMS1511918-supplement-1.pdf [file NIHMS1511918-supplement-1.pdf]

# Activation of silent biosynthetic gene clusters using transcription factor decoys

Bin Wang<sup>1</sup>, Fang Guo<sup>2</sup>, Shi-Hui Dong<sup>1,3</sup>, and Huimin Zhao<sup>1,2,3,4,\*</sup>

<sup>1</sup>Carl R. Woese Institute for Genomic Biology, University of Illinois at Urbana-Champaign, Urbana, IL, USA. <sup>2</sup>Department of Chemical and Biomolecular Engineering, University of Illinois at Urbana-Champaign, Urbana, IL, USA. <sup>3</sup>Department of Biochemistry, University of Illinois at Urbana-Champaign, Urbana, IL, USA. <sup>4</sup>Department of Chemistry, University of Illinois at Urbana-Champaign, Urbana, IL, USA. \* e-mail: zhao5@illinois.edu

## SUPPLEMENTARY TABLES

**Supplementary Table 1.** antiSMASH<sup>1</sup> analysis of multiple streptomycetes used in this study

| <i>Streptomyces coelicolor</i> A3(2) |            |                     |                  |            |               |
|--------------------------------------|------------|---------------------|------------------|------------|---------------|
| cluster                              | length /kb | type                | known product    | study      | result        |
| 1                                    | 53         | otherks-t1pks       |                  | this study | not activated |
| 2                                    | 26         | terpene             | isorenieratene   |            |               |
| 3                                    | 35         | lantipeptide        |                  |            |               |
| 4                                    | 51         | nrps                | coelichelin      |            |               |
| 5                                    | 10         | bacteriocin         | 5-Hydroxyectoine |            |               |
| 6                                    | 41         | t3pks               | THN/flaviolin    |            |               |
| 7                                    | 10         | ectoine             |                  |            |               |
| 8                                    | 11         | melanin             |                  |            |               |
| 9                                    | 12         | siderophore         | Desferrioxamine  |            |               |
| 10                                   | 81         | nrps                | CDA              |            |               |
| 11                                   | 43         | t2pks               | ACT              |            |               |
| 12                                   | 21         | terpene             | Albaflavenone    |            |               |
| 13                                   | 43         | t2pks               | spore pigment    |            |               |
| 14                                   | 12         | siderophore         |                  |            |               |
| 15                                   | 47         | t1pks               | RED              |            |               |
| 16                                   | 11         | bacteriocin         |                  |            |               |
| 17                                   | 22         | terpene             | Geosmin          |            |               |
| 18                                   | 13         | siderophore         |                  |            |               |
| 19                                   | 67         | butyrolactone-t1pks | coelimycin       |            |               |
| 20                                   | 48         | nrps                |                  | this study | not activated |
| 21                                   | 23         | lantipeptide        |                  |            |               |
| 22                                   | 27         | terpene             | Hopene           |            |               |
| 23                                   | 48         | otherks-t1pks       | 1MPKSsco         |            |               |
| 24                                   | 25         | lantipeptide        |                  |            |               |
| 25                                   | 41         | other               |                  |            |               |
| 26                                   | 21         | indole              |                  |            |               |
| 27                                   | 83         | t3pks-nrps-terpene  | coelibactin      |            |               |

| <i>Streptomyces albus</i> J1074 |            |                          |                   |            |           |  |
|---------------------------------|------------|--------------------------|-------------------|------------|-----------|--|
| cluster                         | length /kb | type                     | known product     | study      | result    |  |
| 1                               | 59         | t1pks-nrps               |                   | this study |           |  |
| 2                               | 49         | nrps-t1pks               | 6-epi-alteramides |            |           |  |
| 3                               | 27         | terpene                  |                   |            |           |  |
| 4                               | 10         | bacteriocin              |                   |            |           |  |
| 5                               | 41         | otherks                  | paulomycin        |            |           |  |
| 6                               | 11         | bacteriocin              |                   |            |           |  |
| 7                               | 63         | nrps                     |                   | this study |           |  |
| 8                               | 15         | siderophore              |                   |            |           |  |
| 9                               | 22         | terpene                  |                   |            |           |  |
| 10                              | 21         | terpene                  |                   |            |           |  |
| 11                              | 32         | thiopeptide-lantipeptide |                   |            |           |  |
| 12                              | 11         | bacteriocin              |                   |            |           |  |
| 13                              | 23         | lantipeptide             |                   |            |           |  |
| 14                              | 50         | nrps                     |                   | this study | activated |  |
| 15                              | 106        | nrps                     | surugamides       |            |           |  |
| 16                              | 44         | nrps                     |                   |            |           |  |
| 17                              | 12         | siderophore              |                   |            |           |  |
| 18                              | 10         | ectoine                  |                   |            |           |  |
| 19                              | 44         | other                    | indigoidine       |            |           |  |
| 20                              | 29         | bacteriocin-terpene      |                   |            |           |  |
| 21                              | 41         | t3pks                    |                   |            |           |  |
| 22                              | 155        | t1pks                    | FR-008/candicidin |            |           |  |
| 23                              | 74         | nrps-t1pks-lantipeptide  | antimycin         |            |           |  |
| 24                              | 64         | t1pks                    |                   |            |           |  |

| <i>Streptomyces</i> sp. F-5635 (ssp8) |            |                             |                                                                             |            |           |
|---------------------------------------|------------|-----------------------------|-----------------------------------------------------------------------------|------------|-----------|
| cluster                               | length /kb | type                        | similar BGC                                                                 | study      | result    |
| 1                                     | 41         | T3pks                       | Herboxidiene_biosynthetic_gene_cluster (8% of genes show similarity)        |            |           |
| 2                                     | 96         | T3pks-T1pks-Nrps            | Daptomycin_biosynthetic_gene_cluster (14% of genes show similarity)         | this study | activated |
| 3                                     | 12         | Siderophore                 | Desferrioxamine_B_biosynthetic_gene_cluster (100% of genes show similarity) |            |           |
| 4                                     | 11         | Melanin                     | Melanin_biosynthetic_gene_cluster (60% of genes show similarity)            |            |           |
| 5                                     | 42         | T2pks                       | Spore_pigment_biosynthetic_gene_cluster (66% of genes show similarity)      |            |           |
| 6                                     | 21         | Terpene                     | Albaflavenone_biosynthetic_gene_cluster (100% of genes show similarity)     |            |           |
| 7                                     | 24         | Terpene                     | -                                                                           |            |           |
| 8                                     | 41         | T3pks                       | Alkylresorcinol_biosynthetic_gene_cluster (100% of genes show similarity)   |            |           |
| 9                                     | 10         | Bacteriocin                 | Informatipeptin_biosynthetic_gene_cluster (42% of genes show similarity)    |            |           |
| 10                                    | 42         | T2pks                       | Fluostatin_biosynthetic_gene_cluster (20% of genes show similarity)         | this study |           |
| 11                                    | 12         | Siderophore                 | -                                                                           |            |           |
| 12                                    | 51         | Nrps                        | Coelichelin_biosynthetic_gene_cluster (100% of genes show similarity)       |            |           |
| 13                                    | 73         | Phosphonate-T1pks-Ladderane | Pactamycin_biosynthetic_gene_cluster (20% of genes show similarity)         | this study |           |
| 14                                    | 73         | Siderophore-Nrps            | Meilingmycin_biosynthetic_gene_cluster (3% of genes show similarity)        | this study | activated |
| 15                                    | 22         | Terpene                     | Herboxidiene_biosynthetic_gene_cluster (3% of genes show similarity)        |            |           |
| 16                                    | 11         | Bacteriocin                 | -                                                                           |            |           |
| 17                                    | 80         | T1pks                       | Vicenistatin_biosynthetic_gene_cluster (65% of genes show similarity)       | this study |           |
| 18                                    | 10         | Ectoine                     | Ectoine_biosynthetic_gene_cluster (100% of genes show similarity)           |            |           |
| 19                                    | 54         | Nrps                        | Coelibactin_biosynthetic_gene_cluster (100% of genes show similarity)       | this study |           |
| 20                                    | 24         | Terpene                     | Carotenoid_biosynthetic_gene_cluster (45% of genes show similarity)         |            |           |
| 21                                    | 46         | Nucleoside-Nrps             | A54145_biosynthetic_gene_cluster (5% of genes show similarity)              | this study |           |
| 22                                    | 60         | T1pks                       | Pellasoren_biosynthetic_gene_cluster (33% of genes show similarity)         |            |           |
| 23                                    | 27         | Terpene                     | Hopene_biosynthetic_gene_cluster (92% of genes show similarity)             |            |           |
| 24                                    | 21         | Indole                      | Ravidomycin_biosynthetic_gene_cluster (5% of genes show similarity)         |            |           |
| 25                                    | 34         | Oligosaccharide             | Cinerubin_B_biosynthetic_gene_cluster (17% of genes show similarity)        |            |           |
| 26                                    | 47         | Nrps                        | Grincamycin_biosynthetic_gene_cluster (8% of genes show similarity)         |            |           |
| 27                                    | 22         | Terpene                     | Azinomycin_B_biosynthetic_gene_cluster (6% of genes show similarity)        |            |           |
| 28                                    | 134        | T1pks-Nrps                  | Lasalocid_biosynthetic_gene_cluster (13% of genes show similarity)          | this study | activated |

*Streptomyces griseofuscus* B-5429 (sgri)

| cluster | length /kb | type                              | similar BGC                                                                 | study      | result    |
|---------|------------|-----------------------------------|-----------------------------------------------------------------------------|------------|-----------|
| 1       | 12         | Siderophore                       | Desferrioxamine_B_biosynthetic_gene_cluster (100% of genes show similarity) |            |           |
| 2       | 11         | Melanin                           | Istamycin_biosynthetic_gene_cluster (4% of genes show similarity)           |            |           |
| 3       | 84         | T1pks-Nrps                        |                                                                             | this study |           |
| 4       | 22         | terpene                           |                                                                             |            |           |
| 5       | 36         | Lantipeptide                      | A-503083_biosynthetic_gene_cluster (7% of genes show similarity)            |            |           |
| 6       | 13         | Siderophore                       | -                                                                           |            |           |
| 7       | 44         | Other                             | -                                                                           |            |           |
| 8       | 25         | T1pks                             | Tetronasin_biosynthetic_gene_cluster (3% of genes show similarity)          | this study |           |
| 9       | 10         | Bacteriocin                       | Informatipeptin_biosynthetic_gene_cluster (28% of genes show similarity)    |            |           |
| 10      | 43         | T2pks                             | Spore_pigment_biosynthetic_gene_cluster (83% of genes show similarity)      |            |           |
| 11      | 58         | T1pks-Otherks                     | Tetronasin_biosynthetic_gene_cluster (3% of genes show similarity)          | this study |           |
| 12      | 89         | Nrps                              | Kirromycin_biosynthetic_gene_cluster (16% of genes show similarity)         |            |           |
| 13      | 43         | Other                             | SCO-2138_biosynthetic_gene_cluster (64% of genes show similarity)           |            |           |
| 14      | 11         | Bacteriocin                       | -                                                                           |            |           |
| 15      | 22         | Terpene                           | -                                                                           |            |           |
| 16      | 10         | Ectoine                           | Ectoine_biosynthetic_gene_cluster (100% of genes show similarity)           |            |           |
| 17      | 93         | T1pks-Nrps                        | Meridamycin_biosynthetic_gene_cluster (26% of genes show similarity)        | this study | activated |
| 18      | 74         | Lantipeptide-Nrps                 | -                                                                           |            |           |
| 19      | 52         | Thiopeptide-Terpene               | Hopene_biosynthetic_gene_cluster (92% of genes show similarity)             |            |           |
| 20      | 68         | T1pks-Nrps                        | Meilingmycin_biosynthetic_gene_cluster (3% of genes show similarity)        |            |           |
| 21      | 52         | T1pks-Otherks                     | Cinnamycin_biosynthetic_gene_cluster (19% of genes show similarity)         |            |           |
| 22      | 55         | Nrps                              | PM100117_/PM100118_biosynthetic_gene_cluster (8% of genes show similarity)  |            |           |
| 23      | 41         | T3pks                             | Herboxidiene_biosynthetic_gene_cluster (7% of genes show similarity)        |            |           |
| 24      | 47         | T1pks                             | Filipin_biosynthetic_gene_cluster (92% of genes show similarity)            |            |           |
| 25      | 48         | T1pks                             |                                                                             |            |           |
| 26      | 71         | Terpene-T2pks-T1pks-Butyrolactone | Lactonamycin_biosynthetic_gene_cluster (28% of genes show similarity)       | this study | activated |
| 27      | 26         | terpene                           | Friulimicin_biosynthetic_gene_cluster (15% of genes show similarity)        |            |           |
| 28      | 42         | other                             |                                                                             |            |           |
| 29      | 21         | terpene                           | Albaflavenone_biosynthetic_gene_cluster (100% of genes show similarity)     |            |           |
| 30      | 50         | Transatpks-T1pks-Nrps             | Cinnabaramide_biosynthetic_gene_cluster (18% of genes show similarity)      |            |           |
| 31      | 70         | Ectoine-Nrps                      | Pristinamycin_biosynthetic_gene_cluster (29% of genes show similarity)      |            |           |

|    |    |                  |                                                                             |
|----|----|------------------|-----------------------------------------------------------------------------|
| 32 | 13 | Siderophore      | Cinnabaramide_biosynthetic_gene_cluster (9% of genes show similarity)       |
| 33 | 23 | Lantipeptide     | -                                                                           |
| 34 | 26 | Terpene          | Carotenoid_biosynthetic_gene_cluster (63% of genes show similarity)         |
| 35 | 48 | Other            | -                                                                           |
| 36 | 60 | Nrps             | Stenothricin_biosynthetic_gene_cluster (13% of genes show similarity)       |
| 37 | 67 | T1pks-Nrps       | Vicenistatin_biosynthetic_gene_cluster (15% of genes show similarity)       |
| 38 | 48 | T1pks            | Carbapenem_MM_4550_biosynthetic_gene_cluster (10% of genes show similarity) |
| 39 | 11 | Butyrolactone    | Thioviridamide_biosynthetic_gene_cluster (10% of genes show similarity)     |
| 40 | 48 | Nrps-Siderophore | Kinamycin_biosynthetic_gene_cluster (20% of genes show similarity)          |
| 41 | 45 | Nrps             | Lankacidin_biosynthetic_gene_cluster (60% of genes show similarity)         |
| 42 | 47 | T1pks            | Lankamycin_biosynthetic_gene_cluster (56% of genes show similarity)         |
| 43 | 56 | T1pks            | Lorneic_acid_A_biosynthetic_gene_cluster (14% of genes show similarity)     |
| 44 | 62 | T1pks            | Cremimycin_biosynthetic_gene_cluster (17% of genes show similarity)         |

---

| <i>Streptomyces</i> sp. F-4335 (ssp7) |            |                             |                                                                              |            |           |
|---------------------------------------|------------|-----------------------------|------------------------------------------------------------------------------|------------|-----------|
| cluster                               | length /kb | type                        | similar BGC                                                                  | study      | result    |
| 1                                     | 35         | Butyrolactone               | Echosides_biosynthetic_gene_cluster (11% of genes show similarity)           |            |           |
| 2                                     | 21         | Terpene                     | 2-methylisoborneol_biosynthetic_gene_cluster (100% of genes show similarity) |            |           |
| 3                                     | 23         | Lantipeptide                | SapB_gene_cluster (100% of genes show similarity)                            |            |           |
| 4                                     | 21         | Terpene                     | -                                                                            |            |           |
| 5                                     | 63         | Nrps                        | Maklamicin_biosynthetic_gene_cluster (4% of genes show similarity)           |            |           |
| 6                                     | 44         | Other                       | -                                                                            |            |           |
| 7                                     | 41         | Other                       | Gentamicin_biosynthetic_gene_cluster (3% of genes show similarity)           |            |           |
| 8                                     | 12         | Siderophore                 | Desferrioxamine_B_biosynthetic_gene_cluster (100% of genes show similarity)  |            |           |
| 9                                     | 15         | Siderophore                 | -                                                                            |            |           |
| 10                                    | 112        | T1pks-Nrps                  | Salinomycin_biosynthetic_gene_cluster (30% of genes show similarity)         | this study |           |
| 11                                    | 22         | Terpene                     | Dynemicin_biosynthetic_gene_cluster (3% of genes show similarity)            |            |           |
| 12                                    | 27         | Terpene                     | Hopene_gene_cluster (61% of genes show similarity)                           |            |           |
| 13                                    | 52         | T1pks-Otherks               | -                                                                            |            |           |
| 14                                    | 59         | Phosphonate-T1pks-Ladderane | Neocarzilin_biosynthetic_gene_cluster (14% of genes show similarity)         | this study |           |
| 15                                    | 58         | Melanin-Terpene             | Melanin_gene_cluster (28% of genes show similarity)                          |            |           |
| 16                                    | 13         | Siderophore                 | -                                                                            |            |           |
| 17                                    | 41         | T3pks                       | Alkylresorcinol_biosynthetic_gene_cluster (100% of genes show similarity)    |            |           |
| 18                                    | 61         | T1pks-Nrps                  | Akaeolide_biosynthetic_gene_cluster (12% of genes show similarity)           | this study |           |
| 19                                    | 11         | Butyrolactone               | Sanglifehrin_A_biosynthetic_gene_cluster (4% of genes show similarity)       |            |           |
| 20                                    | 41         | Arylpolyene                 | Svaricin_biosynthetic_gene_cluster (12% of genes show similarity)            |            |           |
| 21                                    | 43         | T2pks                       | Spore_pigment_biosynthetic_gene_cluster (66% of genes show similarity)       |            |           |
| 22                                    | 10         | Ectoine                     | Ectoine_gene_cluster (100% of genes show similarity)                         |            |           |
| 23                                    | 44         | Other                       | Lipstatin_biosynthetic_gene_cluster (42% of genes show similarity)           |            |           |
| 24                                    | 98         | Transatpks-Nrps             | Oxazolomycin_biosynthetic_gene_cluster (21% of genes show similarity)        | this study | activated |
| 25                                    | 63         | T1pks-Nrps                  | Coelichelin_biosynthetic_gene_cluster (72% of genes show similarity)         |            |           |
| 26                                    | 47         | T1pks                       | Herboxidiene_biosynthetic_gene_cluster (10% of genes show similarity)        |            |           |
| 27                                    | 49         | T1pks                       | Himastatin_biosynthetic_gene_cluster (20% of genes show similarity)          |            |           |
| 28                                    | 87         | Nrps                        | Kirromycin_biosynthetic_gene_cluster (23% of genes show similarity)          | this study | activated |
| 29                                    | 33         | Bacteriocin                 | -                                                                            |            |           |

**Supplementary Table 2.** Statistics for evaluating the effectiveness of the TFD strategy

| Protocol        | Number of Strains | Number of BGCs | Number of Constructs | Number of Fermentations | Number of Activated BGCs |
|-----------------|-------------------|----------------|----------------------|-------------------------|--------------------------|
| Low throughput  | 3                 | 11             | 27                   | 27                      | 4                        |
| High throughput | 2                 | 10             | 34                   | 9                       | 4                        |

**Supplementary Table 3.** *Streptomyces* strains used in this study and their culture conditions

| strains                                      | designation | sporulation     | conjugation spores/mycelia, solid media    | liquid fermentation |
|----------------------------------------------|-------------|-----------------|--------------------------------------------|---------------------|
| <i>Streptomyces albus</i> J1074              | salb        | MS <sup>2</sup> | spores, MS                                 | MYM <sup>3</sup>    |
| <i>Streptomyces coelicolor</i> A3(2)         | sco         | MS              | spores, MS                                 | MYM                 |
| <i>Streptomyces griseofuscus</i> NRRL B-5429 | sgri        | MS              | mycelium growing in YEME liquid medium, MS | MYM                 |
| <i>Streptomyces lividans</i> 66              | sli         | MS              | spores, MS                                 | MYM                 |
| <i>Streptomyces</i> sp. F-4335               | ssp7        | ISP4            | spores, ISP4                               | MYM                 |
| <i>Streptomyces</i> sp. NRRL F-5635          | ssp8        | MS              | spores, MS                                 | MYM                 |

**Supplementary Table 4.** Media used in this study

| MYM, 1 L      |      | MS, 1 L         |      |
|---------------|------|-----------------|------|
| maltose       | 4 g  | soy bean powder | 20 g |
| yeast extract | 4 g  | mannitol        | 20 g |
| malt extract  | 10 g | agar            | 20 g |
| agar          | 15 g |                 |      |



**Supplementary Table 5. Primers used in this study**

| Template gDNA                        | TFD description                     | Primer      | Sequence                                          |
|--------------------------------------|-------------------------------------|-------------|---------------------------------------------------|
| <i>neo</i> for constructing pKCW101  |                                     | neoF        | ccggggacctgcatagatccTGAGAATTCTAATAGCTGAC          |
|                                      |                                     | neoR        | ccgattcattaatgcagTCAGAAGAACTCGTCAAG               |
| <i>S. lividans</i> 66, RED           | <i>RsliM18I</i> , <i>redD</i>       | RsliM18-F1  | gatcgaagagaagcaggacgTGGGGTCCCGGTTCGATCAC          |
|                                      |                                     | RsliM18-R1  | ggcaccacagcgtttactCGTCCTGACCGGCCGCGA              |
|                                      | <i>RsliM18II</i> , structural       | RsliM18-F2  | gaagagaagcaggacgGCGAAACCGTCGACCAGC                |
|                                      |                                     | RsliM18-R2  | ccccagcgtttactCGGGACGGCAGACAGGAA                  |
|                                      | <i>RsliM18III</i> , <i>redZ</i>     | RsliM18-F3  | ccggggacctgcatagatct <b>TGGTCTCCACCTGCACTTTCA</b> |
|                                      |                                     | RsliM18-R3  | ccgattcattaatgcagctg <b>GCCCGGCCGCACCTTCTT</b>    |
| <i>S. lividans</i> 66, ACT           | <i>RsliM14I</i> , <i>actII-orf4</i> | RsliM14-F1  | ccggggacctgcatagatctGCACCGGCTCGCCCGGCG            |
|                                      |                                     | RsliM14-R1  | ccgattcattaatgcagctgCGTGCCGCTGAGGAGCAGC           |
|                                      | <i>RsliM14II</i> , mini-PKS         | RsliM14-F2  | gaagagaagcaggaogCCGCTGGTCGCACCCGTC                |
|                                      |                                     | RsliM14-R2  | ccccagcgtttactGATACGGGACCCCTCGATGCC               |
|                                      | <i>RsliM14III</i> , structural      | RsliM14-F3  | ccggggacctgcatagatct <b>CGTAGCCGGCGAAGTCAC</b>    |
|                                      |                                     | RsliM14-R3  | ccgattcattaatgcagctg <b>GCCGACGGCTGTTGACGC</b>    |
|                                      | <i>RsliM14IV</i> , <i>hypo</i>      | RsliM14-F4  | ccggggacctgcatagatct <b>GCACCCCTACTTCGGTACC</b>   |
|                                      |                                     | RsliM14-R4  | ccgattcattaatgcagctg <b>CCGCCTCGAGACCGTCGA</b>    |
|                                      | <i>RsliM14V</i> , <i>tetR</i>       | RsliM14-F5  | ccggggacctgcatagatct <b>TGCCGAGCGCCGTGACGA</b>    |
|                                      |                                     | RsliM14-R5  | ccgattcattaatgcagctg <b>GTAACGCCGACGGCGGGG</b>    |
| <i>S. coelicolor</i> A3(2)           | <i>RscoM1I</i>                      | RscoM1-F1   | ccggggacctgcatagatct <b>GGTCGACCGGTGGGTGG</b>     |
|                                      |                                     | RscoM1-R1   | ccgattcattaatgcagctg <b>AGGCGCAGCCCGAGGAATC</b>   |
|                                      | <i>RscoM1II</i>                     | RscoM1-F2   | ccggggacctgcatagatct <b>GCAGCCGGTCGGCGGGGA</b>    |
|                                      |                                     | RscoM1-R2   | ccgattcattaatgcagctg <b>CGACCAGGACGGCGTGC</b>     |
|                                      | <i>RscoM20I</i>                     | RscoM20-F1  | ccggggacctgcatagatct <b>CCAGGCCGAGTGCCCGG</b>     |
|                                      |                                     | RscoM20-R1  | ccgattcattaatgcagctg <b>AACGGGCCAGGGCGCCTTC</b>   |
|                                      | <i>RscoM20II</i>                    | RscoM20-F2  | ccggggacctgcatagatct <b>GTCCAGCAGCAACCGCG</b>     |
|                                      |                                     | RscoM20-R2  | ccgattcattaatgcagctg <b>AGGTCGTGTCGGCGGCGA</b>    |
| <i>S. albus</i> J1074                | <i>RsalbM1I</i>                     | RsalbM1-F1  | ccggggacctgcatagatct <b>CCCGTTCGGCCAGCGCCA</b>    |
|                                      |                                     | RsalbM1-R1  | ccgattcattaatgcagctg <b>GGTGGACGCAGAACAGCGGG</b>  |
|                                      | <i>RsalbM1II</i>                    | RsalbM1-F2  | ccggggacctgcatagatct <b>TCCGCTGGGTACCGCGCT</b>    |
|                                      |                                     | RsalbM1-R2  | ccgattcattaatgcagctg <b>CCGCCGTCACCTGGAATC</b>    |
|                                      | <i>RsalbM7I</i>                     | RsalbM7-F1  | ccggggacctgcatagatct <b>CGCCCCCTACACCGGCCG</b>    |
|                                      |                                     | RsalbM7-R1  | ccgattcattaatgcagctg <b>CGGTGGCAGGTCCAGGG</b>     |
|                                      | <i>RsalbM7II</i>                    | RsalbM7-F2  | ccggggacctgcatagatct <b>CGTGCGGCCTGCGTCCT</b>     |
|                                      |                                     | RsalbM7-R2  | ccgattcattaatgcagctg <b>TGTCGCCAGCGAAGCGATG</b>   |
|                                      | <i>RsalbM14I</i>                    | RsalbM14-F1 | ccggggacctgcatagatct <b>CGGGGCTGTCCGGGTGAG</b>    |
|                                      |                                     | RsalbM14-R1 | ccgattcattaatgcagctg <b>CCGGGGTGGACGGGTGG</b>     |
|                                      | <i>RsalbM14II</i>                   | RsalbM14-F2 | ccggggacctgcatagatct <b>CTGTTCTGGCGAGGCGGG</b>    |
|                                      |                                     | RsalbM14-R2 | ccgattcattaatgcagctg <b>CCTGCACCGCGTGATGATC</b>   |
| <i>Streptomyces</i> sp. F-5635, ssp8 | <i>Rssp8M2I</i>                     | Rssp8M2-F1  | ccggggacctgcatagatcc <b>CGCGCTTGCGGAGAAGCC</b>    |

| Template gDNA                    | TFD description    | Primer      | Sequence                                                 |
|----------------------------------|--------------------|-------------|----------------------------------------------------------|
|                                  |                    | Rssp8M2-R1  | ctctgtcagctattagaattcCTCGCGCCCCCTCGTCGGC                 |
|                                  | <i>Rssp8M2II</i>   | Rssp8M2-F2  | cggggacctgcataggatccCCTCGTGATCGAGGATGTG                  |
|                                  |                    | Rssp8M2-R2  | ctctgtcagctattagaattcACATAGGTGGAGAACAGG                  |
|                                  | <i>Rssp8M10I</i>   | Rssp8M10-F1 | cggggacctgcataggatccGGGGTACCGGGTGC GGAT                  |
|                                  |                    | Rssp8M10-R1 | ctctgtcagctattagaattcCCTGTGCGGCATCTCGGTC                 |
|                                  | <i>Rssp8M10II</i>  | Rssp8M10-F2 | cggggacctgcataggatccCCAGGACTCCTTCCTCGGC                  |
|                                  |                    | Rssp8M10-R2 | ctctgtcagctattagaattcGGGTACCGCGACGGGTGC                  |
|                                  | <i>Rssp8M13I</i>   | Rssp8M13-F1 | cggggacctgcataggatccAGTCGGCCGTGTCGGTGA                   |
|                                  |                    | Rssp8M13-R1 | ctctgtcagctattagaattcGTGCAGCAGCTCCGCGAT                  |
|                                  | <i>Rssp8M13II</i>  | Rssp8M13-F2 | cggggacctgcataggatccGAGGGCGCTGTCCTGGGA                   |
|                                  |                    | Rssp8M13-R2 | ctctgtcagctattagaattcACGATTGGCGCAGAGATAGGC               |
|                                  | <i>Rssp8M14I</i>   | Rssp8M14-F1 | cggggacctgcataggatccCCGGGACCGTCACGTCCT                   |
|                                  |                    | Rssp8M14-R1 | ctctgtcagctattagaattcGAGAAGGACCTGTGTGTGAAA<br>AAGGC      |
|                                  | <i>Rssp8M14II</i>  | Rssp8M14-F2 | cggggacctgcataggatccGAGTCCCGGTGACCGCCG                   |
|                                  |                    | Rssp8M14-R2 | ctctgtcagctattagaattcCAGGCAGCCACCCGCCG                   |
|                                  | <i>Rssp8M17I</i>   | Rssp8M17-F1 | cggggacctgcataggatccCGTTGGCGTGCATGAAGAC                  |
|                                  |                    | Rssp8M17-R1 | ctctgtcagctattagaattcCGTACCGCGCTCATCGCT                  |
|                                  | <i>Rssp8M17II</i>  | Rssp8M17-F2 | cggggacctgcataggatccCGCCCCAGCGGGAAAGTT                   |
|                                  |                    | Rssp8M17-R2 | ctctgtcagctattagaattcGATGACTCCGCTGGCCAG                  |
|                                  | <i>Rssp8M19I</i>   | Rssp8M19-F1 | cggggacctgcataggatccCCTCACGCAGGCGAGCAC                   |
|                                  |                    | Rssp8M19-R1 | ctctgtcagctattagaattcCTGCAGTGCGTGTGCGAC                  |
|                                  | <i>Rssp8M21I</i>   | Rssp8M21-F1 | cggggacctgcataggatccGTGCGCCGAGACCCGGGC                   |
|                                  |                    | Rssp8M21-R1 | ctctgtcagctattagaattcGCGCGCCATCACCCACAG                  |
|                                  | <i>Rssp8M21II</i>  | Rssp8M21-F2 | cggggacctgcataggatccATGCCAGCGCCACGAGCG                   |
|                                  |                    | Rssp8M21-R2 | ctctgtcagctattagaattcCTCGGCCACGGCACCGATG                 |
|                                  | <i>Rssp8M28I</i>   | Rssp8M28-F1 | cggggacctgcataggatccGTCGAGCAGGGCGTGAAC                   |
|                                  |                    | Rssp8M28-R1 | ctctgtcagctattagaattcCATGGACCCGGGGTCGAG                  |
|                                  | <i>Rssp8M28II</i>  | Rssp8M28-F2 | cggggacctgcataggatccCTTGTTGGCGACGTCCGAG                  |
|                                  |                    | Rssp8M28-R2 | ctctgtcagctattagaattcTCCCAGACGTTGGATCAG                  |
| <i>S. griseofuscus</i><br>B-5429 | <i>RsgriM3I</i>    | RsgriM3-F1  | cggggacctgcataggatccCCGCGACCGTCATCACCTG                  |
| Rsgri library                    |                    | RsgriM3-R1  | ctctgtcagctattagaattcTCCGACCCGGGCGGTCTC                  |
|                                  | <i>RsgriM3II</i>   | RsgriM3-F2  | cggggacctgcataggatccGCCCCAGCACTTCCACCG                   |
|                                  |                    | RsgriM3-R2  | ctctgtcagctattagaattcCACCCGGCCGGCCAGATG                  |
|                                  | <i>RsgriM3III</i>  | RsgriM3-F3  | cggggacctgcataggatccAGCCGCCCGCGTGC GGCA                  |
|                                  |                    | RsgriM3-R3  | ctctgtcagctattagaattcCAGGTCATTGAGCGCGAGTC<br>TGCGGAAACCC |
|                                  | <i>RsgriM17I</i>   | RsgriM17-F1 | cggggacctgcataggatccCTCGCGCGAAGGGAGCGG                   |
|                                  |                    | RsgriM17-R1 | ctctgtcagctattagaattcCAGCCGGCACGCCAGACC                  |
|                                  | <i>RsgriM17II</i>  | RsgriM17-F2 | cggggacctgcataggatccTCGCGGGCGGCAGAAGGA                   |
|                                  |                    | RsgriM17-R2 | ctctgtcagctattagaattcGTGGATGTGGTTCGGCGGTG                |
|                                  | <i>RsgriM17III</i> | RsgriM17-F3 | cggggacctgcataggatccCCGGCCCCGGCTTCCACGA                  |
|                                  |                    | RsgriM17-R3 | ctctgtcagctattagaattcGCACACCTCCTCGTCGCGC                 |
|                                  | <i>RsgriM17IV</i>  | RsgriM17-F4 | cggggacctgcataggatccCCTGGAGCCCGGCGGCCG                   |

| Template gDNA                                      | TFD description    | Primer      | Sequence                                          |
|----------------------------------------------------|--------------------|-------------|---------------------------------------------------|
|                                                    |                    | RsgriM17-R4 | ctctgtcagctattagaattcCATCGGGTGCGCCCGGTC           |
|                                                    | <i>RsgriM17V</i>   | RsgriM17-F5 | cggggacctgcataggatccGAGCGGCACGAACCTGCG            |
|                                                    |                    | RsgriM17-R5 | ctctgtcagctattagaattcCTCGTCGTGCCGTACCGG           |
|                                                    | <i>RsgriM26I</i>   | RsgriM26-F1 | cggggacctgcataggatccGGCCCCCATGACGCGGG             |
|                                                    |                    | RsgriM26-R1 | ctctgtcagctattagaattcCGCGAGCAGCGCAGCAC            |
|                                                    | <i>RsgriM26II</i>  | RsgriM26-F2 | cggggacctgcataggatccCGAGGCGCTCGGGGCCGC            |
|                                                    |                    | RsgriM26-R2 | ctctgtcagctattagaattcCCGGGTGCGGGTGCGGAC           |
|                                                    | <i>RsgriM26III</i> | RsgriM26-F3 | cggggacctgcataggatccGCTCCAGCGCCTGCACCAG           |
|                                                    |                    | RsgriM26-R3 | ctctgtcagctattagaattcATGGGGCACGGGCTGCGC           |
|                                                    | <i>RsgriM26IV</i>  | RsgriM26-F4 | cggggacctgcataggatccCGACGAGGAGACCGTACTG           |
|                                                    |                    | RsgriM26-R4 | ctctgtcagctattagaattcCGACAGCAGCGCGAGGAT           |
|                                                    | <i>RsgriM26V</i>   | RsgriM26-F5 | cggggacctgcataggatccTGCGGATCAGGCGGTGGAC           |
|                                                    |                    | RsgriM26-R5 | ctctgtcagctattagaattcCGCCAGCAGGGCCAGCAC           |
|                                                    | <i>RsgriM26VI</i>  | RsgriM26-F6 | cggggacctgcataggatccTGAGTGGGGTCAGCCAGG            |
|                                                    |                    | RsgriM26-R6 | ctctgtcagctattagaattcCACCCGTACGACCGGGCC           |
| <i>Streptomyces</i><br>sp. F-4335<br>Rssp7 library | <i>Rssp7M10I</i>   | Rssp7M10-F1 | cggggacctgcataggatccTCGGCAACAGCGGTGGCTCG          |
|                                                    |                    | Rssp7M10-R1 | ctctgtcagctattagaattcGTGGCGGTGCCCGGGCCG           |
|                                                    | <i>Rssp7M10II</i>  | Rssp7M10-F2 | cggggacctgcataggatccGACCTGCGTGTCTACCCC            |
|                                                    |                    | Rssp7M10-R2 | ctctgtcagctattagaattcGGCGACGACCTGCTTCTC           |
|                                                    | <i>Rssp7M10III</i> | Rssp7M10-F3 | cggggacctgcataggatccCGCTTCCCGAAGCTGCGC            |
|                                                    |                    | Rssp7M10-R3 | ctctgtcagctattagaattcCTCGACCATGAGCACCCG           |
|                                                    | <i>Rssp7M10IV</i>  | Rssp7M10-F4 | cggggacctgcataggatccCGGAAGAAGGCCGGGCTG            |
|                                                    |                    | Rssp7M10-R4 | ctctgtcagctattagaattcGTGGGGGTGTTGTCGTC            |
|                                                    | <i>Rssp7M14I</i>   | Rssp7M14-F1 | cggggacctgcataggatccTCGGGCCACGGGGCCGC             |
|                                                    |                    | Rssp7M14-R1 | ctctgtcagctattagaattcCGCCCTCGGCGATACCTGGGTCC      |
|                                                    | <i>Rssp7M14II</i>  | Rssp7M14-F2 | cggggacctgcataggatccCTGGCCCCGTCCGCGAC             |
|                                                    |                    | Rssp7M14-R2 | ctctgtcagctattagaattcCGGGCCCGATGCCGGCAG           |
|                                                    | <i>Rssp7M14III</i> | Rssp7M14-F3 | cggggacctgcataggatccCTGCTCCAGGTCGCGCTG            |
|                                                    |                    | Rssp7M14-R3 | ctctgtcagctattagaattcGTCCATGAGCAGGTCCAG           |
|                                                    | <i>Rssp7M14IV</i>  | Rssp7M14-F4 | cggggacctgcataggatccGTAGGCTGCCAGCTGGT             |
|                                                    |                    | Rssp7M14-R4 | ctctgtcagctattagaattcGAACTTGATCGCCAGCATCTC        |
|                                                    | <i>Rssp7M14V</i>   | Rssp7M14-F5 | cggggacctgcataggatccCTCGTTCCCGGACCGGTG            |
|                                                    |                    | Rssp7M14-R5 | ctctgtcagctattagaattcGATGATGCGTACCGCGCC           |
|                                                    | <i>Rssp7M18I</i>   | Rssp7M18-F1 | cggggacctgcataggatccGGCCGTCACGCCGTGATGA<br>GTGCGG |
|                                                    |                    | Rssp7M18-R1 | ctctgtcagctattagaattcGGCGGGCGGGGGCCGGGT           |
|                                                    | <i>Rssp7M18II</i>  | Rssp7M18-F2 | cggggacctgcataggatccGATGAGTTCAGCCGGGTCAAG         |
|                                                    |                    | Rssp7M18-R2 | ctctgtcagctattagaattcCAGCTCCTCGCCGAGCTG           |
|                                                    | <i>Rssp7M18III</i> | Rssp7M18-F3 | cggggacctgcataggatccCCCCAGAGCTTCCAATTCCGC         |
|                                                    |                    | Rssp7M18-R3 | ctctgtcagctattagaattcCTGGACCACCGGGCAG             |
|                                                    | <i>Rssp7M18IV</i>  | Rssp7M18-F4 | cggggacctgcataggatccGAGGGCATGTCCGGGCTC            |
|                                                    |                    | Rssp7M18-R4 | ctctgtcagctattagaattcGCTGGCGGCCCGGATCAG           |
|                                                    | <i>Rssp7M24I</i>   | Rssp7M24-F1 | cggggacctgcataggatccGAGCGGATCCGCGTTGAAG           |

| Template gDNA  | TFD description    | Primer         | Sequence                                  |
|----------------|--------------------|----------------|-------------------------------------------|
|                |                    | Rssp7M24-R1    | ctcttgcagctattagaattcCAGGTGCGTGTTCGCGATAG |
|                | <i>Rssp7M24II</i>  | Rssp7M24-F2    | cggggacctgcataggatccGGGTCCC GCCTGGAGCTG   |
|                |                    | Rssp7M24-R2    | ctcttgcagctattagaattcCAGGCCGTCCC GCCCCTC  |
|                | <i>Rssp7M28I</i>   | Rssp7M28-F1    | cggggacctgcataggatccGGGTGATACGTCCCCTGC    |
|                |                    | Rssp7M28-R1    | ctcttgcagctattagaattcGATGGTGTAGTCGAGGCG   |
|                | <i>Rssp7M28II</i>  | Rssp7M28-F2    | cggggacctgcataggatccCGCGTCCACGTCCACCGT    |
|                |                    | Rssp7M28-R2    | ctcttgcagctattagaattcGTACGTGTGCCCTGCGC    |
|                | <i>Rssp7M28III</i> | Rssp7M28-F3    | cggggacctgcataggatccGTGATCGCCGCCACGGC     |
|                |                    | Rssp7M28-R3    | ctcttgcagctattagaattcGGCCGGGACGGGGTTGGC   |
|                | <i>Rssp7M28IV</i>  | Rssp7M28-F4    | cggggacctgcataggatccGACGTCGCCACCGACCAC    |
|                |                    | Rssp7M28-R4    | ctcttgcagctattagaattcGAACTGCGGGGCGAGCAC   |
|                | <i>Rssp7M28V</i>   | Rssp7M28-F5    | cggggacctgcataggatccCAGGAAGGCCAGGATCGCG   |
|                |                    | Rssp7M28-R5    | ctcttgcagctattagaattcGGTGC GGAGCGCGGTCTC  |
| RT-PCR primers |                    | SigmaFactor-F  | GCGGCATGCTCTTCCTGG                        |
|                |                    | SigmaFactor-R  | ACTCGCTGTTCGCCGTCCT                       |
|                |                    | RTssp7M10IV-F1 | ACGCACGCCGAGCGGTTGAA                      |
|                |                    | RTssp7M10IV-R1 | ATCGTGCGCACACGGTGGTCT                     |
|                |                    | RTssp7M10IV-F2 | CGGCGAAGAAGTGTCGCTGAT                     |
|                |                    | RTssp7M10IV-R2 | AAGTGCATGGTGGGGGTGG                       |

**Supplementary Table 6.** Gene annotation of the *oze* cluster

---

| Oxazolepoxidomycin A, <i>oze</i> cluster |            |            |                                              |
|------------------------------------------|------------|------------|----------------------------------------------|
| gene                                     | gene locus | size in bp | proposed function                            |
| <i>ozeO</i>                              | ctg1_3763  | 846        | MT                                           |
|                                          | //         | 13 kb      |                                              |
| <i>ozeA</i>                              | ctg1_3748  | 3330       | PKS                                          |
| <i>ozeB</i>                              | ctg1_3747  | 3588       | PKS                                          |
| <i>ozeC</i>                              | ctg1_3746  | 10368      | PKS                                          |
| <i>ozeD</i>                              | ctg1_3745  | 3627       | methionyl-tRNA_formyltransferase             |
| <i>ozeE</i>                              | ctg1_3744  | 1134       | similar to <i>ozmP</i> , oxazole cyclization |
| <i>ozeF</i>                              | ctg1_3743  | 2736       | PKS                                          |
| <i>ozeG</i>                              | ctg1_3742  | 25035      | PKS/NRPS                                     |
| <i>ozeH</i>                              | ctg1_3741  | 5019       | PKS                                          |
| <i>ozeI</i>                              | ctg1_3740  | 6123       | NRPS                                         |
| <i>ozeJ</i>                              | ctg1_3739  | 3423       | AT                                           |
| <i>ozeK</i>                              | ctg1_3738  | 1383       | CYP450                                       |
| <i>ozeL</i>                              | ctg1_3737  | 1380       | CYP450                                       |
| <i>ozeM</i>                              | ctg1_3736  | 915        | ER                                           |
| <i>ozeN</i>                              | ctg1_3735  | 738        | ACPS                                         |

---

## SUPPLEMENTARY FIGURES

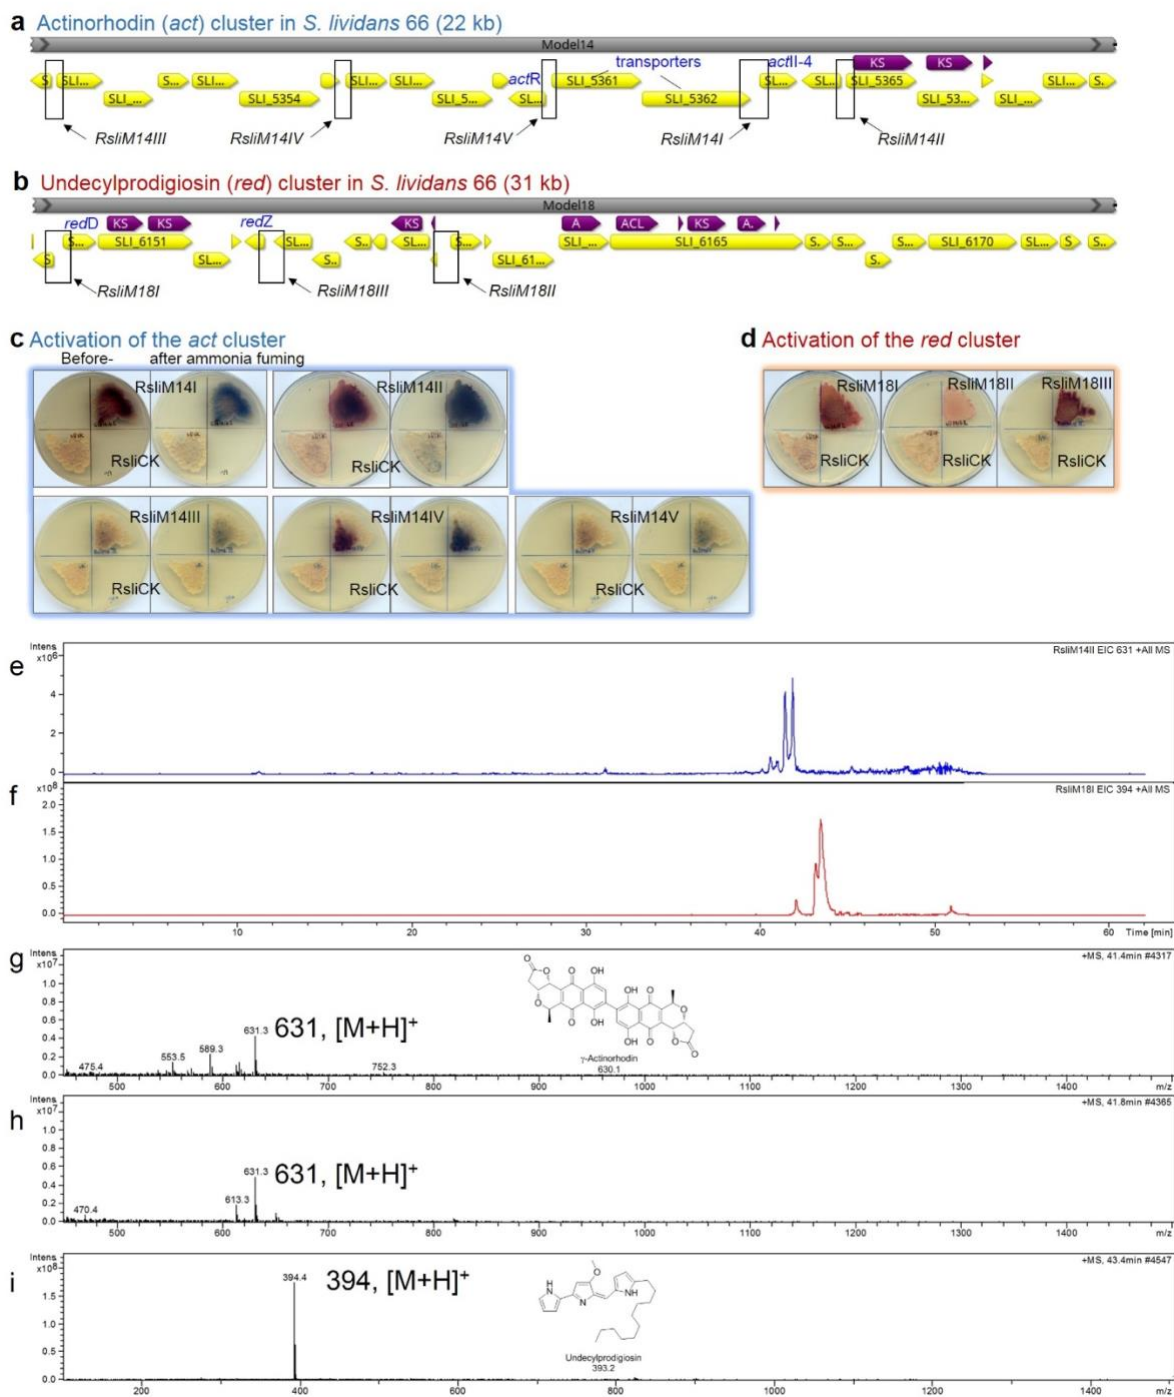

**Supplementary Figure 1.** Activation of BGCs in *Streptomyces lividans* 66. (a-b) are actinorhodin (*act*) and undecylprodigiosin (*red*) BGCs, respectively. (c-d) are recombinant strains that grew on MYM plates and harbored TFDs for activation of the *act* and *red* BGCs, respectively. The blue color in (c) confirmed production of the pH-dependent actinorhodin after ammonia fuming treatment. The red color in (d) indicated undecylprodigiosin production. (e-i) LC-MS analyses of actinorhodin and undecylprodigiosin. (e-f) are extracted ion chromatogram from RslIM14II (recombinant strain harboring the *RslIM14II* TFD) and RslIM18I (recombinant strain harboring the *RslIM18I* TFD). (g-i) are corresponding mass spectra. Triplicate experiments were performed for detection of pigment production on plates and LC-MS, and results were reproducible.

**scoM1 - Cluster 1 - T1pks-otherks**

**Gene cluster description**

scoM1 - Gene Cluster 1. Type = t1pks-otherks. Location: 59 - 53019 nt. Click on genes for more information.  
Show pHMM detection rules used

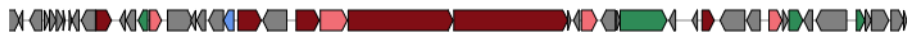

**Legend:**

■ core biosynthetic genes ■ additional biosynthetic genes ■ transport-related genes ■ regulatory genes ■ other genes

**Detailed annotation**

ctg1\_11

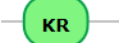

ctg1\_23

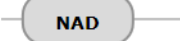

ctg1\_25

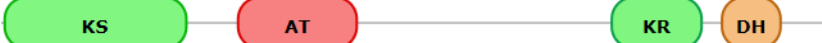

ctg1\_26

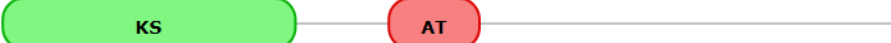

ctg1\_25: KS-AT-ACP-KR-DH, PfaA homolog.

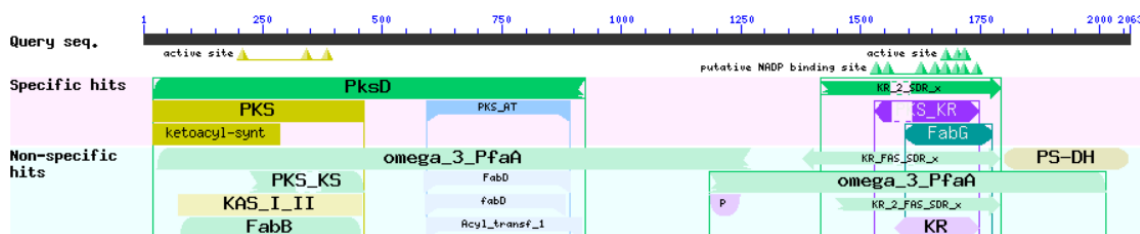

ctg1\_26: KS-KS-AT-DH-DH, PfaC homolog.

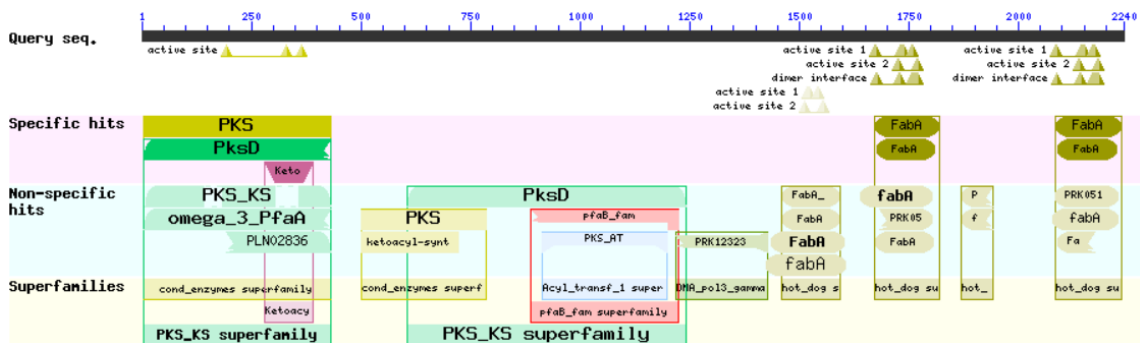

**Supplementary Figure 2.** antiSMASH analysis showed uncommon domain organizations in ctg\_25 and ctg\_26. Further conserved domain analysis suggested they are polyketide-type polyunsaturated fatty acid synthase homologs.

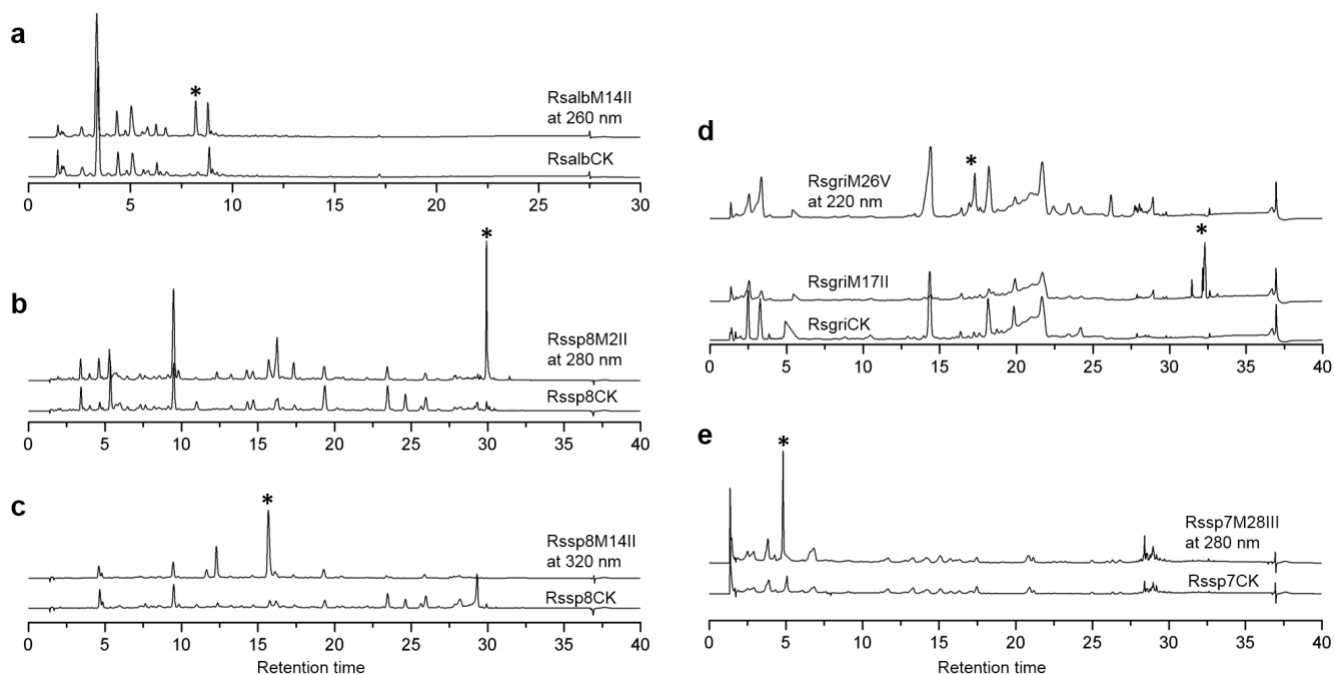

**Supplementary Figure 3.** HPLC analysis of crude extracts from *Streptomyces albus* J1074 (a), *Streptomyces* sp. F-5635 (ssp8) (b-c), *Streptomyces griseofuscus* B-5429 (d), and *Streptomyces* sp. F-4335 (ssp7) (e). New peaks compared to the controls, including recombinants with empty plasmid or other TFDs, are labeled by \*. Triplicate fermentation experiments were performed and results were reproducible.



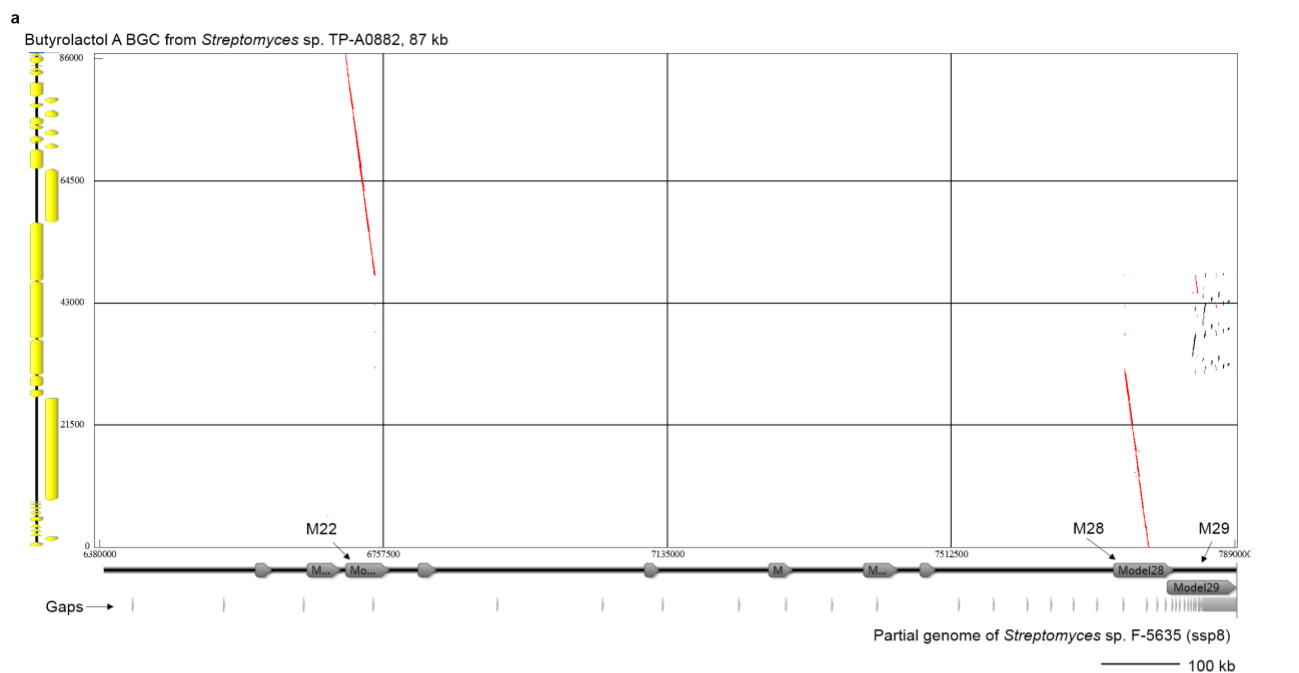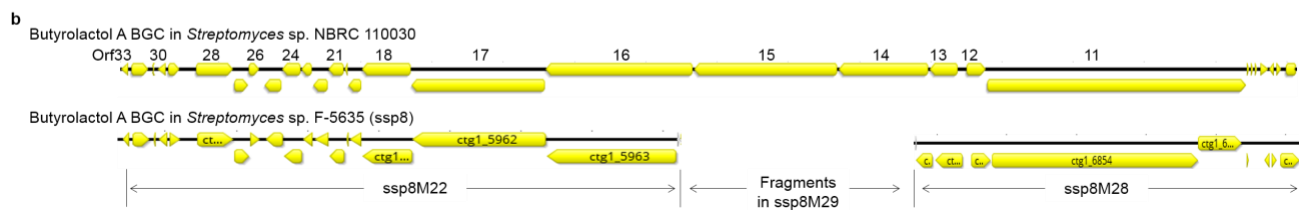

**c**

| ORFs in butyrolactol A BGC | Accession number | Gene locus in ssp8 | Alignment coverage/identity % | Gene annotation                            |
|----------------------------|------------------|--------------------|-------------------------------|--------------------------------------------|
| 33                         | WP_030403663     | ctg1_5946          | 100/100                       | MarR family transcriptional regulator      |
| 32                         | WP_055469561     | ctg1_5947          | 100/99                        | FAD-dependent oxidoreductase               |
| 30                         | WP_055469560     | ctg1_5949          | 100/99                        | TetR/AcrR family transcriptional regulator |
| 29                         | WP_055469559     | ctg1_5950          | 100/99                        | ketopantoate reductase family protein      |
| 28                         | WP_055469558     | ctg1_5951          | 100/99                        | class I SAM-dependent methyltransferase    |
| 27                         | WP_079080699     | ctg1_5952          | 100/99                        | ABC transporter ATP-binding protein        |
| 26                         | WP_055469557     | ctg1_5953          | 100/99                        | ABC transporter permease                   |
| 25                         | WP_055469556     | ctg1_5954          | 100/99                        | hypothetical protein                       |
| 24                         | WP_055469555     | ctg1_5955          | 100/99                        | MFS transporter                            |
| 23                         | WP_030403672     | ctg1_5956          | 100/100                       | thioesterase                               |
| 22                         | WP_055469554     | ctg1_5957          | 100/99                        | HAD-IIIC family phosphatase                |
| 21                         | WP_055469553     | ctg1_5958          | 100/99                        | acyl-CoA dehydrogenase                     |
| 20                         | WP_030403675     | ctg1_5959          | 100/100                       | acyl carrier protein                       |
| 19                         | WP_055469552     | ctg1_5960          | 100/99                        | 3-hydroxybutyryl-CoA dehydrogenase         |
| 18                         | WP_055469551     | ctg1_5961          | 100/99                        | SDR family NAD(P)-dependent oxidoreductase |
| 17                         | WP_055469550     | ctg1_5962          | 100/99                        | type I polyketide synthase                 |
| 16                         | WP_055469549     | ctg1_5963          | 100/99                        | type I polyketide synthase                 |
| 15                         | WP_055469548     |                    |                               | type I polyketide synthase                 |
| 14                         | WP_055469666     |                    |                               | type I polyketide synthase                 |
| 13                         | WP_055469547     | ctg1_6852          | 100/99                        | helix-turn-helix transcriptional regulator |
| 12                         | WP_055469546     | ctg1_6853          | 100/99                        | propionyl-CoA carboxylase subunit beta     |
| 11                         | WP_055469545     | ctg1_6854&6855     | 100/99                        | type I polyketide synthase                 |

**Supplementary Figure 4.** Alignment of *Streptomyces* sp. F-5635 (ssp8) against butyrolactol A BGC from *Streptomyces* sp. NBRC 110030<sup>4,5</sup>. **(a)** is the dot-plotting alignment. The grey arrows in x-axis refer to the BGCs in ssp8 predicted by antiSMASH. The red dot-lines in plot show similar sequences. **(b)** is the sequence map alignment. **(c)** is the gene annotation. The data indicates cluster 22 and 28, and many small pieces in cluster 29 constitute one large cluster for synthesizing butyrolactol A.

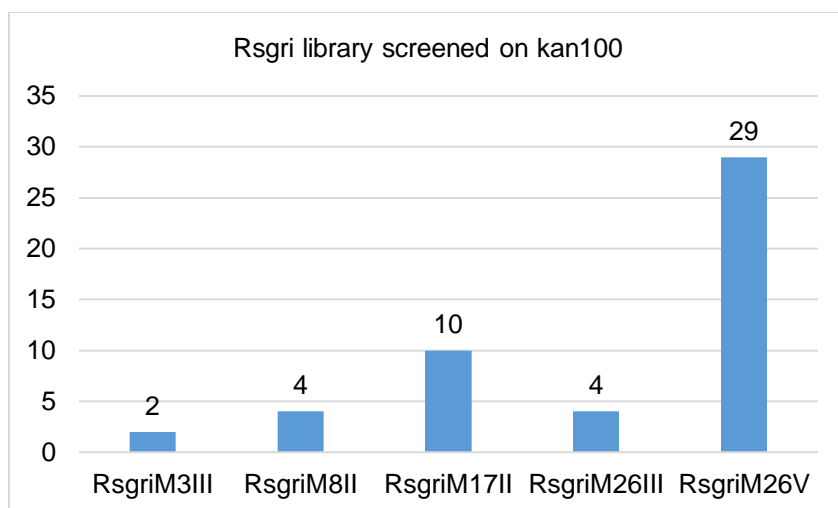

**Supplementary Figure 5.** The screening result of Rsgri library. A total of 50 colonies growing on 100 µg/ml kanamycin plates were picked for sequencing, and it showed except RsgriM26 contains two decoy types, RsgriM26III and RsgriM26V, only one type of decoy recombinant strains can grow on high concentration of kanamycin. Single experiment was performed for library screening.

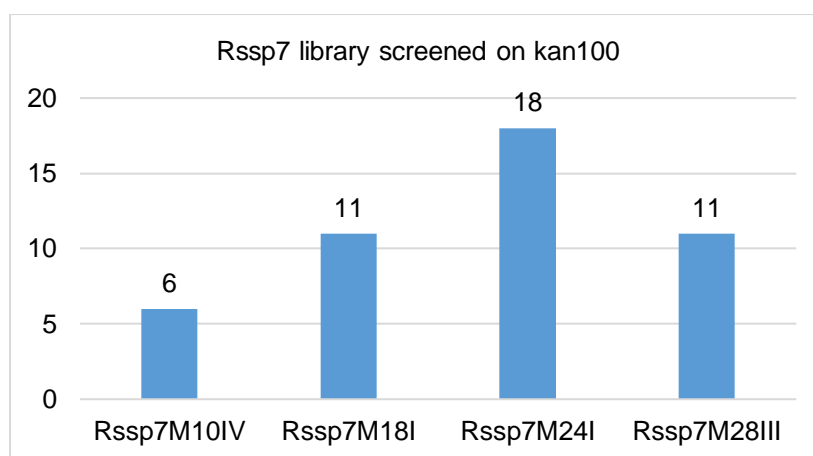

**Supplementary Figure 6.** Screening result of Rssp7 library. A total of 50 colonies growing on 100 µg/ml kanamycin plate were picked for sequencing, and it showed only one type of decoy recombinant strains can grow on high concentration of kanamycin. Single experiment was performed for library screening.

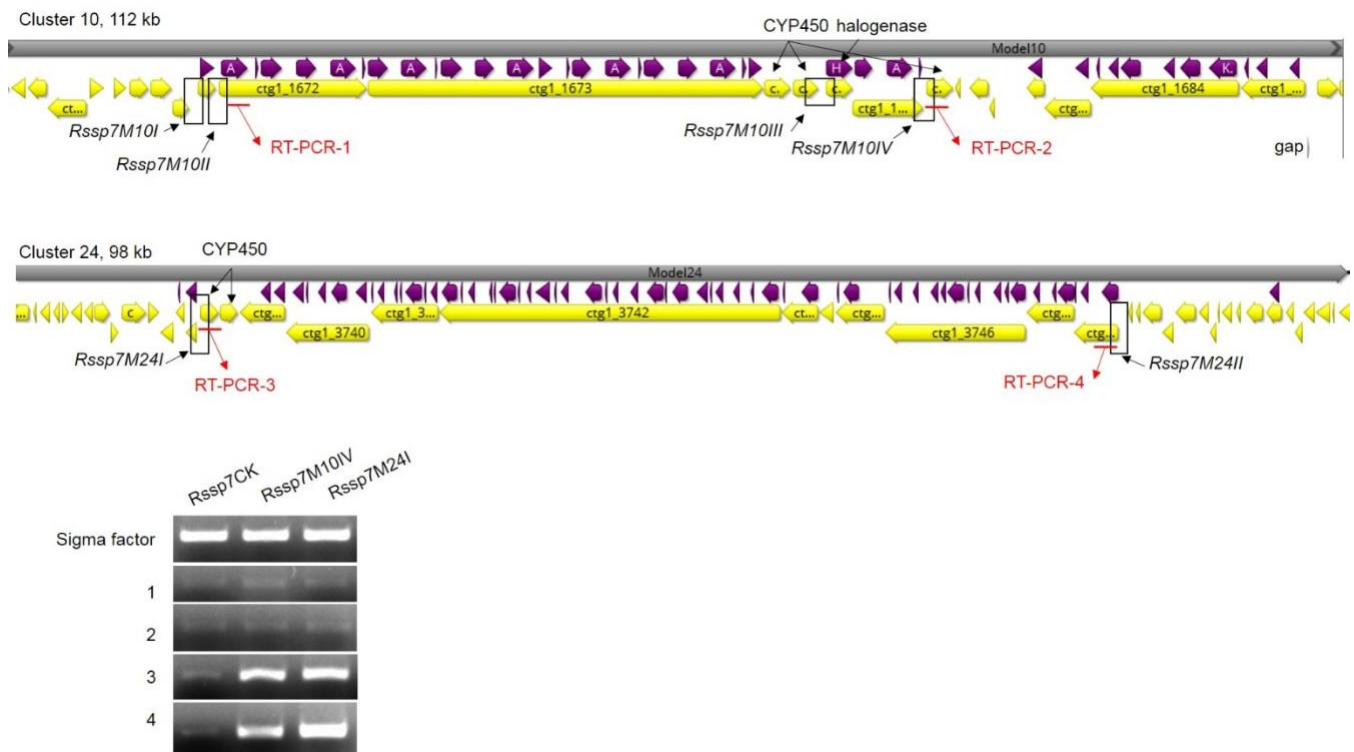

**Supplementary Figure 7.** RT-PCR analysis of the expression levels of two BGCs, *ssp7M10* and *ssp7M24* in two TFD recombinants, *Rssp7M10IV* and *Rssp7M24I*. Corresponding regulatory DNAs are labelled in black boxes, and genes selected for RT-PCR analysis are underlined and numbered in red color. The internal reference gene is the *hrdB* homologous sigma factor. This data demonstrated that all four genes were very lowly expressed in the control group (*Rssp7CK*), while both of the testing groups (*Rssp7M10IV* and *Rssp7M24I*) showed high expression in the two genes from *ssp7M24* (3 and 4) and low expression in the two genes from *ssp7M10* (1 and 2). Duplicate experiments were performed for RT-PCR, and results were reproducible.

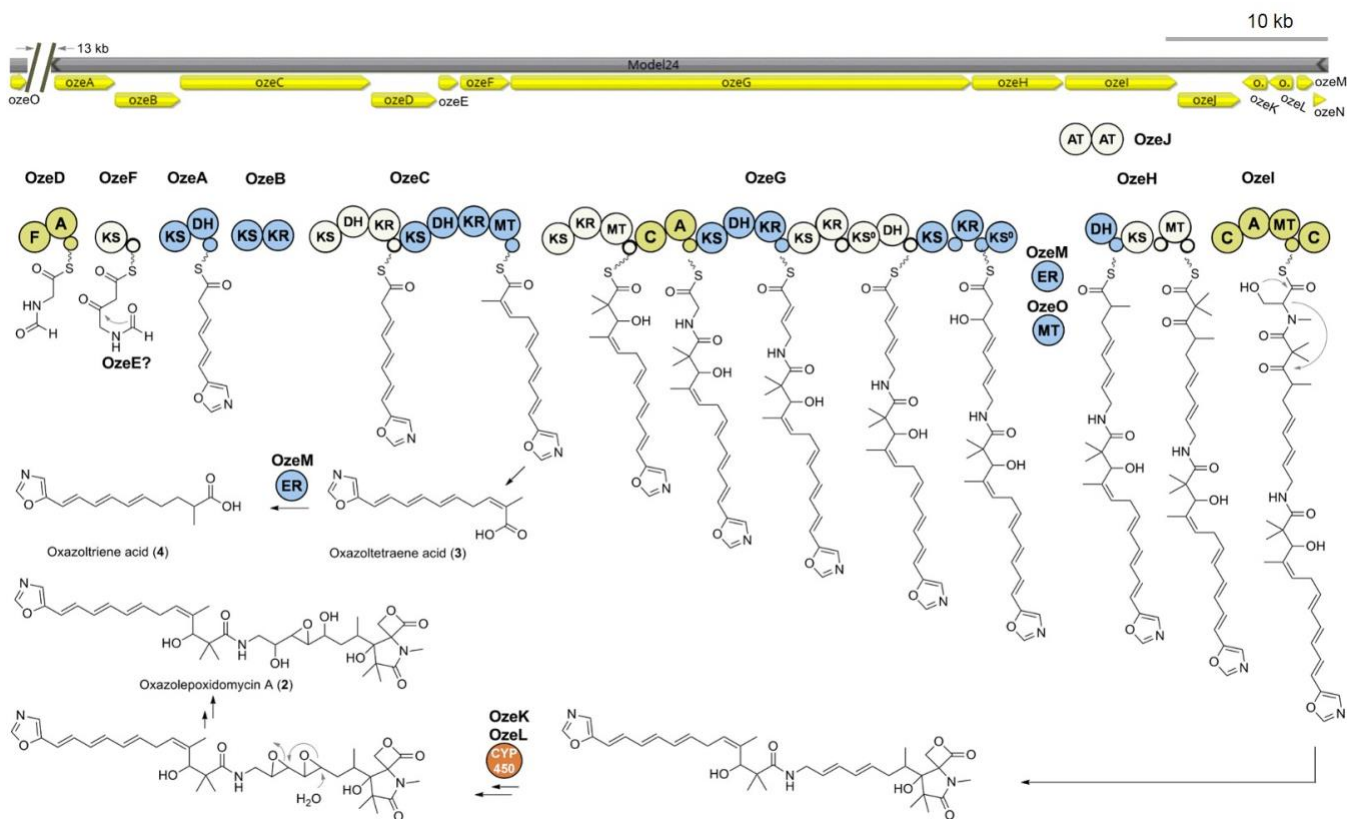

**Supplementary Figure 8. Proposed biosynthetic pathway for oxazolepodidomycin A (2), oxazoltetraene acid (3), and oxazoltriene acid (4).** Oxazolepodidomycin A is synthesized by cluster 24 (*ssp7M24*, *oze*), a *trans*-AT PKS BGC in *Streptomyces* sp. F-4335, of which the core part from *ozeA* to *ozeN* spans 69 kb. A discrete *ozeO* encoding a missing methyltransferase is also proposed (Supplementary Table 6). Connected circles belong to same proteins as shown above, colors refer to different modules. Oxazoltetraene acid (3) and oxazoltriene acid (4) are proposed to be pathway intermediate and shunt product respectively, which are released from OzeC due to loose contact with downstream OzeG. F, formylation; C, condensation; A, adenylation; KS, ketosynthase; KS<sup>0</sup>, non-elongating KS; AT, acyltransferase; DH, dehydratase; KR, ketoreductase; ER, enoyl reductase; MT, methyltransferase; and the small unlabeled circles represent ACP, acyl carrier protein; or PCP, peptidyl carrier protein.

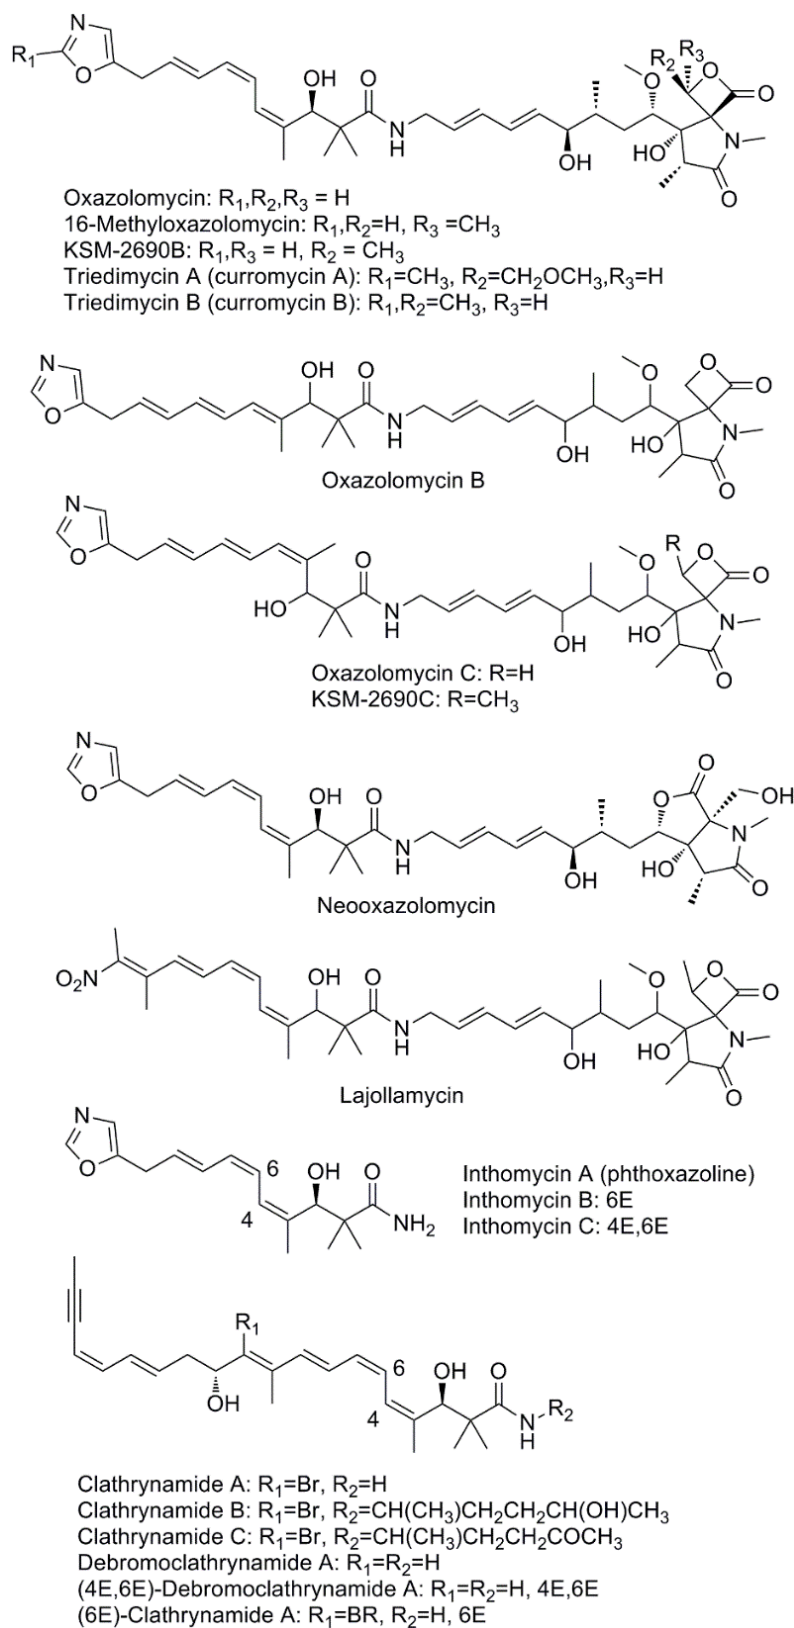

**Supplementary Figure 9.** Oxazolomycin family compounds<sup>6</sup>. Most of them contain a spirocyclic head and an oxazole tail. But the triene systems are always separated from the oxazole, which is the very difference to oxazolepoxidomycin A (2) discovered in this study.

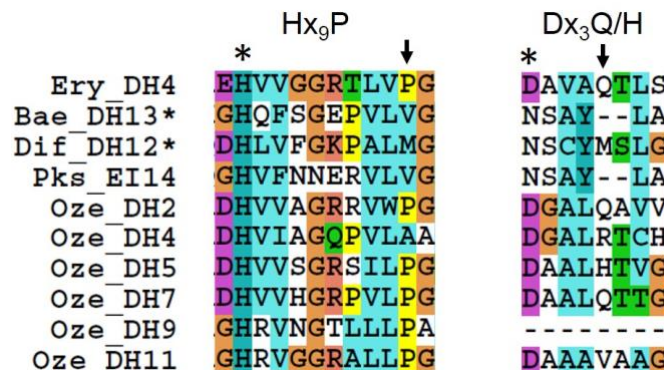

**Supplementary Figure 10.** Sequence alignment of DH domains<sup>6</sup>. Canonical DH domains contain motifs Hx<sub>9</sub>P and Dx<sub>3</sub>Q/H. Domains related to  $\beta,\gamma$ -double bond formation were reported to contain mutated amino acid residues, such as a DH-like domain (DH\*) or enoyl-isomerase domain (EI) that doesn't contain the conserved Proline (black arrow) and also completely loses the Dx<sub>3</sub>Q/H motif. However, for the  $\beta,\gamma$ -diene related dehydratase, Oze\_DH2, the conserved amino acids are all at the exact positions. So there must be some other amino acid sequences that can also determine whether to catalyze  $\beta,\gamma$ -or canonical  $\alpha,\beta$ -double bond formation. In contrast, Oze\_DH4 is shown to be more like DH\* or EI with both motifs mutated at the conserved points.

## References

1. Weber, T. *et al. Nucleic Acids Res.* 43, W237-43 (2015).
2. Kieser, T., Bibb, M.J., Buttner, M.J., Chater, K.F. & Hopwood, D.A. *Practical streptomyces genetics*, (John Innes Foundation Norwich, 2000).
3. Yang, K., Han, L., He, J., Wang, L. & Vining, L.C. *Gene* 279, 165-173 (2001).
4. Kotake, C. *et al. J Antibiot (Tokyo)* 45, 1442-50 (1992).
5. Harunari, E., Komaki, H. & Igarashi, Y. *Beilstein J. Org. Chem.* 13, 441-450 (2017).
6. Helfrich, E.J.N. & Piel, J. *Nat. Prod. Rep.* 33, 231-316 (2016).
